# Supplementary material
Source: publisher figshare collection journal article supplement (https://acs.figshare.com/ndownloader/files/5760531)
Supplement: Supplementary file 1 [file 5760531]

### Time course for inhibition of chymotrypsin by 1

Conditions: [ChT] =  $4.29 \times 10^{-6}$  M

[1] =  $3.09 \times 10^{-5}$  M

[BTNA] =  $9.8 \times 10^{-5}$  M

pH 7.4, 5 mM sodium phosphate buffer system

Assay method :

Incubation at 25 °C was started by mixing chymotrypsin and 1. Aliquots were taken at different times and enzymatic activities were determined by hydrolysis rate of the chromogenic substrate (BTNA).

\* Kinetic equations

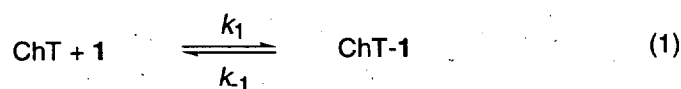

$$v = k_1 [\text{ChT}][1] - k_{-1} [\text{ChT-1}] \quad (2)$$

At the beginning of such a association reaction the concentration of complex is low as compared to the concentrations of free chymotrypsin and 1. the second term of equation (2) can vanish. So,

$$v = k_1 [\text{ChT}][1] \quad (3)$$

Integration of the equation (3) gives the following equation (4) which describes the time course of most associations nearly to completion (about 90 %)

$$\frac{1}{[1]_0 - [\text{ChT}]_0} \ln \frac{[1]_0 - [\text{ChT-1}]}{[\text{ChT}]_0 - [\text{ChT-1}]} = k_1 t + \ln \frac{[1]_0}{[\text{ChT}]_0} \quad (4)$$

$$P = \frac{1}{[\text{ChT}]_0 - [1]_0} \ln \frac{[1]_0 - [\text{ChT-1}]}{[\text{ChT}]_0 - [\text{ChT-1}]}$$

[1]<sub>0</sub> = initial concentration of 1

[ChT]<sub>0</sub> = initial concentration of ChT

[ChT-1] = complex concentration

Ref: Vicent, J.-P., Lazdunski, M. *Biochemistry*, 1972, 11,2967.

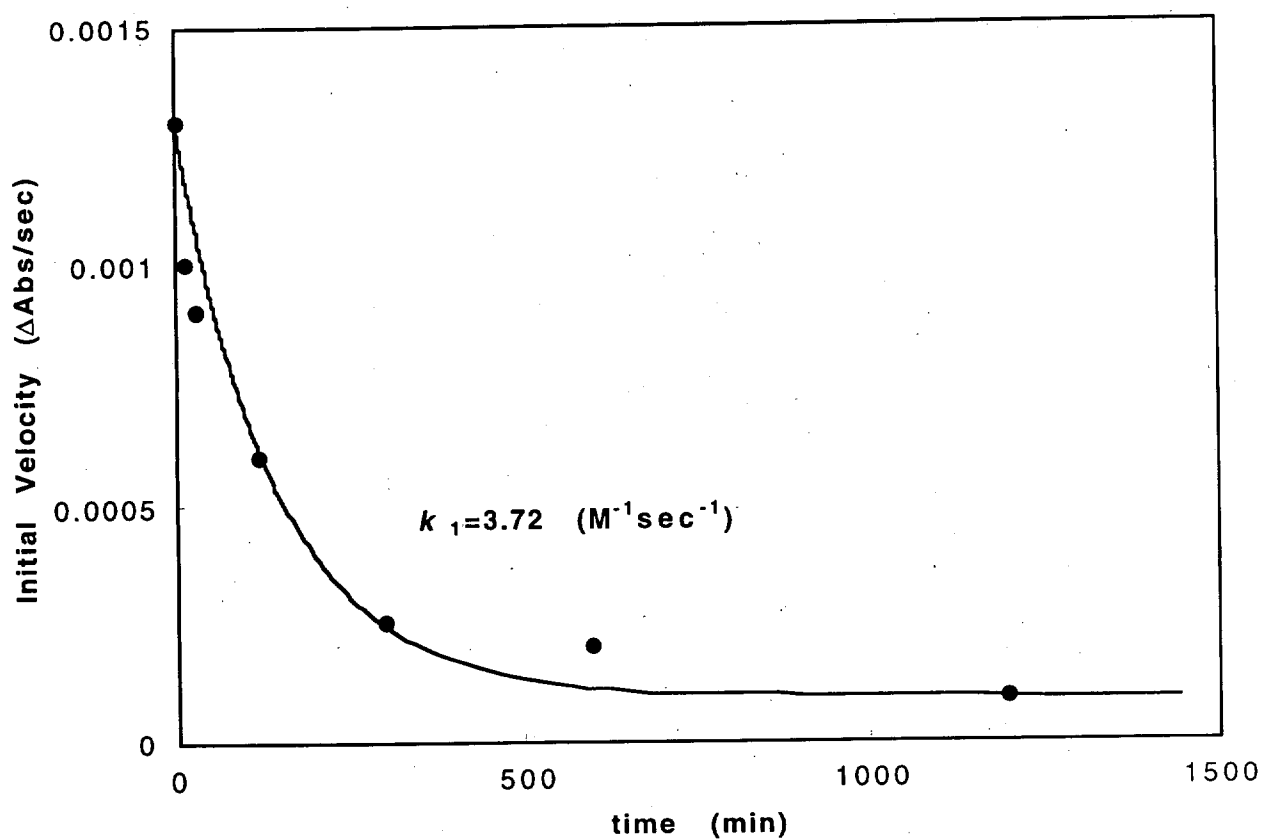

**Figure S1.** Time course for the inhibition of chymotrypsin by **1**.

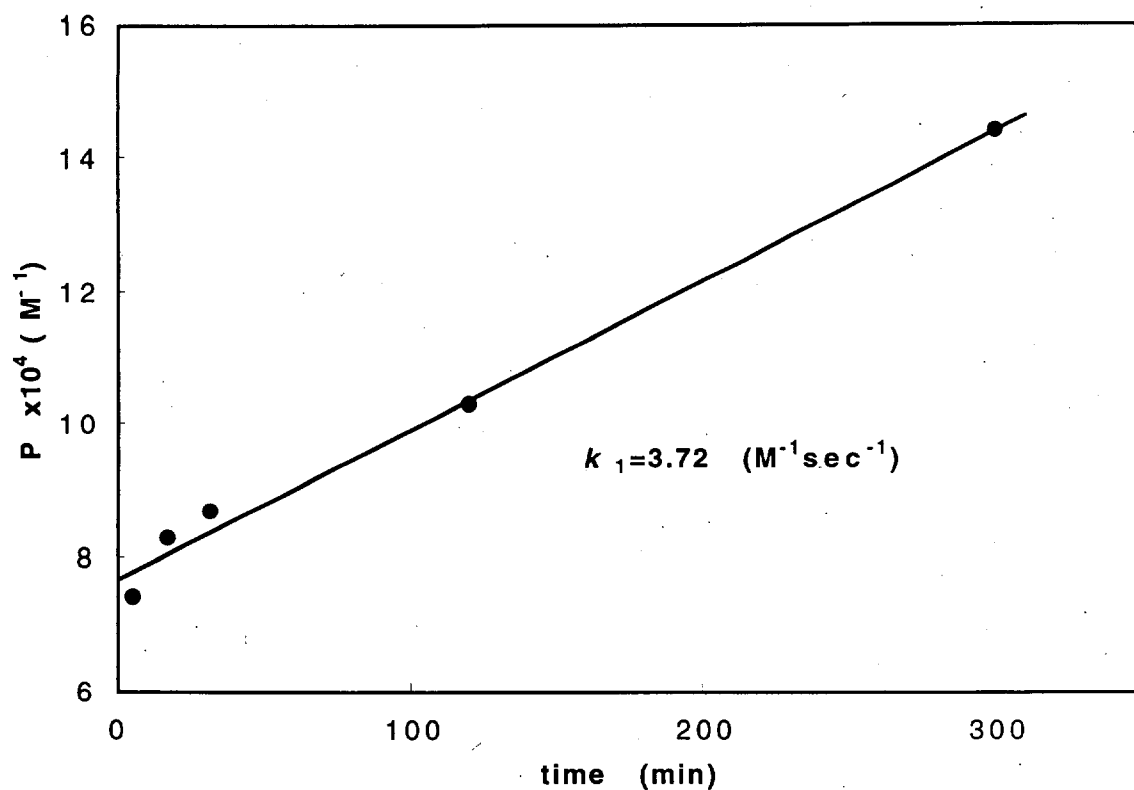

**Figure S2.** Calculation of association rate constants for the inhibition of chymotrypsin by **1**.

**Butoxycalix[4]arene tetracyclo-(GDGD) (1)**

To a solution of butoxycalix[4]arene tetraacid (86 mg, 0.10 mmol) and oxalyl chloride (254 mg, 2.0 mmol) in dry  $\text{CH}_2\text{Cl}_2$  (10 mL) was added DMF (0.025 mL) through a silica gel filter and the mixture was stirred at room temperature for 8 h. The reaction mixture was evaporated in vacuo to obtain the acid chloride (102 mg). A solution of cyclo-GDGDSp- $\text{NH}_2$  (266 mg, 0.44 mmol) and DIEA (80 mg, 0.60 mmol) in dry  $\text{CH}_2\text{Cl}_2$  (10 mL) was added to the evaporated residue. The mixture was stirred at room temperature for 14 h. The reaction mixture was purified by preparative TLC ( $\text{SiO}_2$ , first 1/9 = MeOH/ $\text{CH}_2\text{Cl}_2$ , later 1/4 = MeOH/ $\text{CH}_2\text{Cl}_2$ ) to obtain the desired compound as a yellow powder (281 mg, 89 %): mp > 350 °C;  $^1\text{H}$  NMR (300 MHz,  $\text{DMSO-d}_6$ )  $\delta$  10.10 (broad s, 4H), 8.95 (broad, 4H), 8.49 (broad, 4H), 8.25 (d,  $J$  = 8.7 Hz, 4H), 8.09 (broad, 4H), 7.99 (m, 8H), 7.67 (s, 4H), 7.60 (s, 8H), 7.37 (s, 4H), 4.81 (m, 8H), 4.51 (m, 8H), 3.99 (m, 20H), 3.63 (m, 8H), 3.46 (m, 4H), 2.79 (m, 4H), 2.62 (m, 4H), 2.31 (m, 8H), 1.97 (m, 8H), 1.47 (m, 8H), 1.35 (m, 72H), 1.02 (t,  $J$  = 8.4 Hz, 12H);  $^{13}\text{C}$  NMR (75 MHz,  $\text{DMSO-d}_6$ )  $\delta$  120.1, 117.8, 80.0 (2C), 75.0, 49.1, 48.8, 44.2, 42.3, 41.4, 37.5, 36.9, 31.9, 30.5, 27.6, 18.9, 14.0; To above compound (298 mg, 0.093 mmol) was added TFA (3 mL) and dry  $\text{CH}_2\text{Cl}_2$  (3 mL) and the mixture was stirred at room temperature for 1 hr. The mixture was evaporated under reduced pressure. The crude product was passed through anion exchange resin (Amberlite IRA-400(OH), water) and cation exchange resin (Amberlite IR 120 (plus), water) to remove ions. Water was lyophilized to give the titled compound (229 mg, 90%): mp > 350 °C;  $^1\text{H}$  NMR (300 MHz,  $\text{DMSO-d}_6$ )  $\delta$  10.02 (s, 4H), 8.81 (s, 4H), 8.48 (s, 4H), 8.31 (d,  $J$  = 8.7 Hz, 4H), 7.97 (m, 12H), 7.64 (s, 4H), 7.55 (s, 8H), 7.30 (s, 4H), 4.76 (m, 8H), 4.52 (m, 8H), 4.0-3.4 (m, 32H), 2.8-2.6 (m, 8H), 2.5-2.3 (m, 8H), 1.97 (m, 8H), 1.50 (m, 8H), 1.01 (t, 8.1H);  $^{13}\text{C}$  NMR (75 MHz,  $\text{DMSO-d}_6$ )  $\delta$  172.2, 171.7, 170.9, 170.4, 169.3, 168.5, 165.1, 159.0, 140.2, 138.8, 134.4, 134.2, 128.7, 128.3, 121.4, 119.9, 117.7, 75.0, 49.1, 44.3, 42.2, 41.3, 36.1, 31.9, 30.5, 18.9, 14.0; HR FAB-MS  $m/e$  calcd for  $\text{C}_{128}\text{H}_{145}\text{N}_{24}\text{O}_{44}$  ( $M + \text{H}^+$ ) 2721.9767, found 2721.985.

**Butoxycalix[4]arene tetracyclo-(GDGY) (2)**

To a solution of butoxycalix[4]arene tetraacid (22.5 mg, 0.027 mmol) in 5 mL dry  $\text{CH}_2\text{Cl}_2$  was added oxalyl chloride (146 mg, 1.1 mmol) and catalytic amount of DMF (0.2  $\mu\text{L}$ ), and the mixture was stirred at r.t. overnight. The reaction mixture was evaporated in vacuo to give the acid chloride. A solution of cyclo-(Gly-Asp(O<sup>t</sup>Bu)-Gly-Tyr(O<sup>t</sup>Bu)-Amab) (78.0 mg, 0.12 mmol) and DIEA (15 mg, 0.12 mmol) in dry  $\text{CH}_2\text{Cl}_2$  (5 mL) was added to the acid chloride and the mixture was stirred at r.t. for 2 days. The solvent and excess reagent were evaporated and the residue was applied to a Sephadex LH-20 gel filtration column eluted with  $\text{CH}_2\text{Cl}_2$ . The appropriate portions were collected and evaporated to give the fully protected product. Further treatment with 25% TFA/ $\text{CH}_2\text{Cl}_2$  (5 mL) at r.t. for 2 hr afforded the final product as a light-yellow powder (52.6 mg, 66%): mp > 350 °C (dec.);  $^1\text{H}$  NMR (500 MHz,  $\text{DMSO}-d_6$ )  $\delta$  9.99 (s, 4H), 9.15 (s, b, 4H), 8.74 (s, 4H), 8.42 (d, J = 8.4 Hz, 4H), 8.41 (s, 4H), 8.19 (d, J = 7.2 Hz, 4H), 7.96 (s, 4H), 7.84 (s, 8H), 7.63 (s, 4H), 7.55 (s, 4H), 7.31 (s, 4H), 6.99 (d, J = 8.4 Hz, 8H), 6.64 (d, J = 8.3 Hz, 8H), 4.75 (m, 4H), 4.58 (m, 8H), 4.43 (m, 4H), 4.01 (s, b, 8H), 3.94 (d, J = 14.7 Hz, 4H), 3.74 (m, 12H), 3.57 (m, 8H), 2.90 (dd, J = 13.8 Hz, 5.3 Hz, 4H), 2.80 (dd, J = 16.4 Hz, 5.9 Hz, 4H), 2.63 (dd, J = 13.6 Hz, 9.0 Hz, 4H), 2.48 (m, 4H), 1.96 (m, 8H), 1.49 (m, 8H), 1.03 (t, J = 7.3 Hz, 12H); ES-MS calcd for  $\text{C}_{148}\text{H}_{161}\text{N}_{24}\text{O}_{40}$  2916.90 ( $\text{M}+\text{H}^+$ ), found 2914.74 $\pm$ 0.38.

**Butoxycalix[4]arene tetracyclo-(GKGK) (3)**

To a solution of butoxycalix[4]arene tetraacid (9.2 mg, 0.011 mmol) in 2 mL dry  $\text{CH}_2\text{Cl}_2$  was added oxalyl chloride (29 mg, 0.23 mmol) and a catalytic amount of DMF (0.1  $\mu\text{L}$ ), and the mixture was stirred at r.t. overnight. The reaction mixture was evaporated in vacuo to give the acid chloride. A solution of cyclo-(Gly-Lys(BOC)-Gly-Lys(BOC)-Amab) (32.0 mg, 0.044 mmol) and DIEA (6 mg, 0.048 mmol) in dry  $\text{CH}_2\text{Cl}_2$  (2 mL) was added to the acid chloride and the mixture was stirred at r.t. for 2 days. The solvent and excess reagent were evaporated and the residue was

applied to a Sephadex LH-20 gel filtration column eluted with  $\text{CH}_2\text{Cl}_2$ . The appropriate portions were collected and evaporated to give the fully protected product. Further treatment with 25% TFA/ $\text{CH}_2\text{Cl}_2$  (3 mL) at r.t. for 2 hr afforded the final product as its TFA salt (18 mg, 57%): mp > 290 °C (dec.);  $^1\text{H}$  NMR (500 MHz,  $\text{DMSO-d}_6$ )  $\delta$  9.97 (s, 4H), 8.71 (s, 4H), 8.42 (s, 4H), 8.33 (d,  $J = 9.2$  Hz, 4H), 8.23 (d,  $J = 6.5$  Hz, 4H), 7.95 (s, 4H), 7.85 (s, 8H), 7.67 (s, 4H), 7.49 (d,  $J = 13.8$  Hz, 4H), 7.29 (s, 4H), 4.50 (m, 8H), 4.22 (m, 8H), 3.94 (m, 24H), 3.75 (m, 4H), 3.59 (m, 4H), 2.76 (s, 16H), 1.93 (m, 12H), 1.68 (m, 4H), 1.51 (m, 28H), 1.30 (m, 20H), 1.02 (t,  $J = 7.3$  Hz, 12H); FAB-MS calcd for  $\text{C}_{144}\text{H}_{201}\text{N}_{32}\text{O}_{28}$  2827.28 ( $\text{M}+\text{H}^+$ ), found 2827.4.
